# Supplementary material for: Interrelation between atomic switching disorder and thermoelectric properties of ZrNiSn half-Heusler compounds
Source: Royal Society of Chemistry journal article supplement (doi:10.1039/c2ce25119a), 2012-01-01

# Interrelation between atomic switching disorder and thermoelectric properties of ZrNiSn half-Heusler compounds

Han-Hui Xie,<sup>a</sup> Jian-Li Mi,<sup>b</sup> Li-Peng Hu,<sup>a</sup> Nina Lock,<sup>b</sup> Mogens Chirstensen,<sup>b</sup> Chen-Guang Fu,<sup>a</sup> Bo Brummerstedt Iversen,<sup>\*b</sup> Xin-Bing Zhao<sup>a</sup> and Tie-Jun Zhu<sup>\*a</sup>

## Supplementary Information

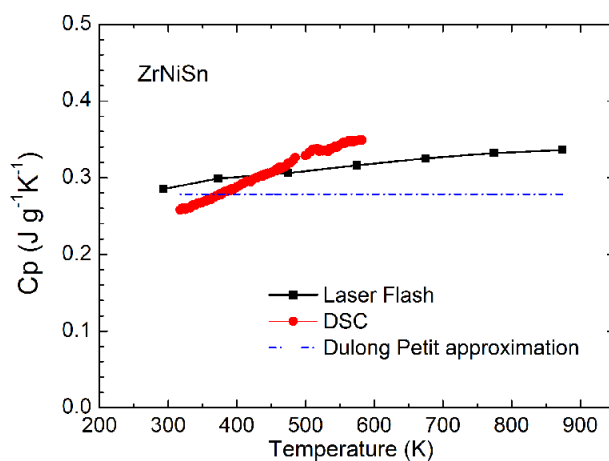

Supplement: c2ce25119a.pdf [file c2ce25119a.pdf]
